# Supplementary material for: Analysis of Early Cone Dysfunction in an In Vivo Model of Rod-Cone Dystrophy
Source: PubMed Central journal article supplement (PMC7503557; doi:10.3390/ijms21176055), 2020-08-22
Supplement: ijms-21-06055-s001.pdf [file ijms-21-06055-s001.pdf]

**Supplementary material: Analysis of early cone dysfunction in an in vivo model of rod cone dystrophy. Hassall et al**

*Supplementary figure 1*

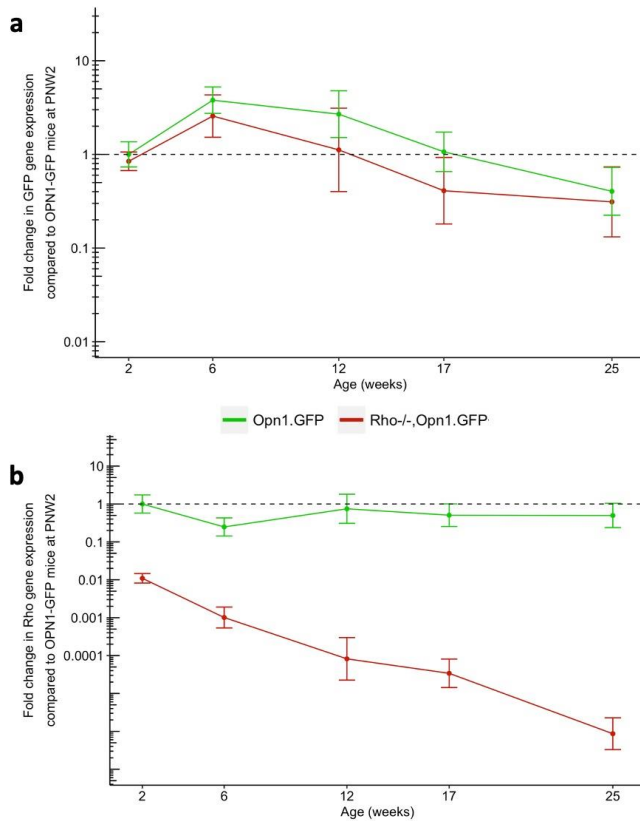

**Supplementary figure 1: Additional qPCR gene expression data (a)** GFP gene expression data over time (post-natal week, PNW, 2, 6, 12, 17 and 25) showing  $2^{-\Delta\Delta Cq}$  values for *Rho<sup>-/-</sup>OPN1-GFP* mice and *OPN1-GFP* mice.  $\Delta\Delta Cq$  values calculated by double normalising the test gene to the mean of *ActB* and *GFP* reference gene levels, then comparing each time point against *OPN1-GFP* mouse expression levels at PNW2 baseline. **(b)** Rhodopsin gene expression data for the same samples, noting the difference in y-axis magnitude. All values are mean  $\pm$  SEM. Tissue samples collected at PNW2 (*OPN1-GFP*  $n=8$ , *Rho<sup>-/-</sup>OPN1-GFP*  $n=8$ ), PNW6 ( $n=3$ ,  $n=5$ ), PNW12, ( $n=3$ ,  $n=3$ ), PNW17 ( $n=3$ ,  $n=4$ ), and PNW25 ( $n=3$ ,  $n=3$ ).

Supplementary figure 2

**a**

$$y = \beta_1 + \beta_2 x_1 + \beta_3 x_2 + \beta_4 x_3 + \beta_5 x_4 + \beta_6 x_5$$

- $y$  Test gene Cq
- $x_1$  Housekeeping gene Cq
- $x_2$  Test gene name
- $x_3$  Mouse genotype
- $x_4$  Time linear
- $x_5$  Time quadratic

**b**

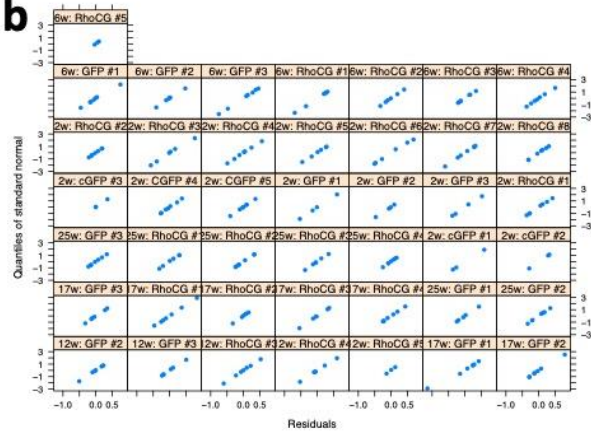

**c**

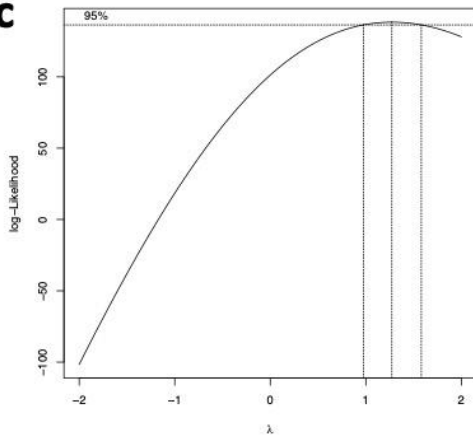

**d**

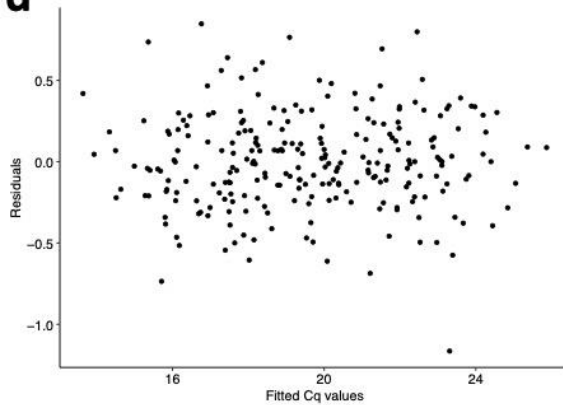

**Supplementary figure 2: Hierarchical polynomial statistical model for qPCR data** (a) Equation for statistical analysis denoting the uncorrected test gene Cq as the dependent variable, with housekeeping gene (mean of *Actb* and *GFP*) Cq as the first explanatory variable and interactions included between mouse genotype, the gene being tested, the linear time value and quadratic time value. (b) Regression model residuals showed some non-normality that was concentrated in a subset of mice, but no experimental basis was identified for exclusion. (c) The Box-Cox profile likelihood did not suggest any transformation. (d) A plot of fitted values against residuals showed homoscedasticity.

## Supplementary table 1

| outcome                                   | Opn1mw  | Opn1mw | Opn1sw  | Opn1sw | Crx     | Crx   | Cnga3  | Cnga3 | ConeArr | ConeArr | Pde6h   | Pde6h | Cngb3  | Cngb3 |
|-------------------------------------------|---------|--------|---------|--------|---------|-------|--------|-------|---------|---------|---------|-------|--------|-------|
| Intercept                                 | -12.061 |        | -12.833 |        | -14.303 |       | -8.291 |       | -11.311 |         | -13.652 |       | -8.915 |       |
| housekeeping                              | 1.646   |        | 1.646   |        | 1.646   |       | 1.646  |       | 1.646   |         | 1.646   |       | 1.646  |       |
| GFP vs Rho <sup>-/-</sup>                 | 0.382   | 0.501  | -0.009  | 0.987  | -0.106  | 0.852 | 0.083  | 0.882 | -0.04   | 0.944   | -0.041  | 0.942 | -0.422 | 0.455 |
| GFP PNW6 v baseline (PNW2)                | 1.08    | 0.162  | 0.395   | 0.604  | 1.464   | 0.061 | 2.219  | 0.006 | 0.492   | 0.517   | 0.367   | 0.639 | 1.789  | 0.024 |
| GFP PNW12 v baseline                      | 0.657   | 0.459  | -0.317  | 0.720  | 0.56    | 0.528 | 1.468  | 0.121 | 0.573   | 0.515   | 0.757   | 0.396 | 1.452  | 0.108 |
| GFP PNW17 v baseline                      | 0.935   | 0.222  | -0.736  | 0.333  | -0.365  | 0.630 | 0.928  | 0.224 | -0.069  | 0.927   | 0.68    | 0.382 | 0.918  | 0.231 |
| GFP PNW25 v baseline                      | 0.644   | 0.396  | -0.674  | 0.385  | -1.287  | 0.095 | 1.195  | 0.129 | -0.248  | 0.742   | 0.285   | 0.706 | 0.308  | 0.683 |
| vs Rho <sup>-/-</sup> PNW6                | 0.058   | 0.953  | 0.383   | 0.695  | 1.247   | 0.208 | -0.145 | 0.883 | 0.918   | 0.359   | 0.649   | 0.519 | 0.381  | 0.699 |
| vs Rho <sup>-/-</sup> PNW12               | -0.253  | 0.826  | 1.195   | 0.308  | 2.037   | 0.084 | -0.596 | 0.629 | -0.807  | 0.489   | -0.85   | 0.466 | -0.864 | 0.459 |
| vs Rho <sup>-/-</sup> PNW17               | 0.405   | 0.688  | 3.034   | 0.005  | 4.211   | 0.000 | 0.879  | 0.395 | 0.684   | 0.500   | 0.009   | 0.993 | 0.28   | 0.781 |
| vs Rho <sup>-/-</sup> PNW25               | 1.616   | 0.116  | 4.441   | 0.000  | 5.091   | 0.000 | 1.578  | 0.132 | 2.067   | 0.047   | 1.712   | 0.098 | 0.823  | 0.416 |
| Rho <sup>-/-</sup> PNW6 v baseline (PNW2) | 1.138   | 0.085  | 0.778   | 0.229  | 2.711   | 0.000 | 2.074  | 0.003 | 1.41    | 0.035   | 1.017   | 0.132 | 2.17   | 0.002 |
| Rho <sup>-/-</sup> PNW12 v baseline       | 0.404   | 0.588  | 0.878   | 0.254  | 2.597   | 0.001 | 0.871  | 0.290 | -0.234  | 0.755   | -0.094  | 0.903 | 0.588  | 0.444 |
| Rho <sup>-/-</sup> PNW17 v baseline       | 1.34    | 0.054  | 2.298   | 0.002  | 3.846   | 0.000 | 1.807  | 0.015 | 0.614   | 0.364   | 0.689   | 0.312 | 1.198  | 0.083 |
| Rho <sup>-/-</sup> PNW25 v baseline       | 2.259   | 0.002  | 3.767   | 0.000  | 3.804   | 0.000 | 2.773  | 0.000 | 1.818   | 0.010   | 1.996   | 0.006 | 1.131  | 0.100 |

**Supplementary table 1: The statistical output of the polynomial model of cone cell qPCR data comparing Rho<sup>-/-</sup>, OPN1-GFP mice to OPN1-GFP mice over time and rate of change.**

A regression model, which included a quadratic polynomial relationship to time, was fitted to the qPCR data using the *nlme* package in R. Uncorrected test gene cycle quantification (Cq) was taken as the dependent variable, with housekeeping gene (*Actb*) Cq as the first explanatory variable and interactions included between mouse genotype, the gene being tested, and linear time as a factor (PNW2, PNW6, PNW12, PNW17, and PNW25). The diagnostic tests confirming a good model fit are provided **Supplementary Figure 1**. The results are also displayed graphically in **Figure 1** of the manuscript. Each individual gene is displayed in columns showing the magnitude of effect and p-value of each variable (fixed effect) in the hierarchical model. This table shows the relevant results of the polynomial model fitted to the repeated-measures qPCR dataset.

Supplementary figure 3 and table 2:

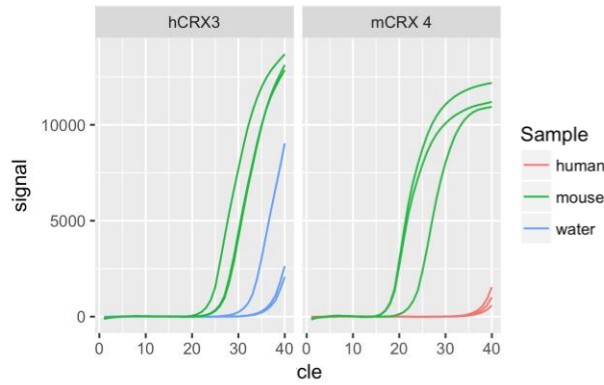

| Gene      | Primer sequence                                                |
|-----------|----------------------------------------------------------------|
| Human CRX | FW-5'-AGGGCCGTCTCTGACCTCC-3'<br>RC-5'-GCTCGGAGACCCATAGGCG-3'   |
| Mouse Crx | FW-5'-CACGTGAGGAGGTTGCTCTT-3'<br>RC-5'-GTAGAGGGTCTCGGGGATGT-3' |

**Supplementary table 2:** Primer pairs for distinguishing between human and mouse orthologs of *CRX*. Mouse *Crx* mRNA is alternatively spliced as isoform 1 (NM\_007770.4) or isoform 2 (NM\_001113330.1); however, the coding sequence of both isoforms share 87.5% homology with human *CRX* coding sequence (NM\_000554.6). In both instances, the nucleotide differences are sparsely spread across the transcript. In an attempt to differentiate between exogenous human transgene sequence and endogenous murine nucleotide sequence, eight qPCR primer pairs were compared.

Supplementary table 3:

| Gene            | Direction | Sequence (5'-3')     |
|-----------------|-----------|----------------------|
| <i>Opn1.GFP</i> | FW        | CACCTACGGCAAGCTGAC   |
|                 | RC        | CTTGTAGTTGCCGTCGTC   |
| <i>Crx</i>      | FW        | CACGTGAGGAGGTTGCTCTT |
|                 | RC        | GTAGAGGGTCTCGGGGATGT |
| <i>Cnga3</i>    | FW        | TAGACATGCTGGTTTCGAGC |
|                 | RC        | GTTGGTCCTTGTCTCTGTG  |
| <i>Cngb3</i>    | FW        | AGCCAGCTCTCAGACTGCA  |
|                 | RC        | ACAGTTCCAGTTATACGCA  |
| <i>Arr3</i>     | FW        | GTGGATGATGTGGACACTG  |
|                 | RC        | CTGGATGCTGGTGGGTTT   |
| <i>Pde6h</i>    | FW        | GAGTCCTCCAGCACCAAG   |
|                 | RC        | TCCCGAACTGAGCAAGCT   |
| <i>Opn1sw</i>   | FW        | ACAGTCTTCATCGCCA     |
|                 | RC        | CAAGTAGCCAGGACCAC    |
| <i>Opn1mw</i>   | FW        | CAGCAACAGCACCAAAGGTC |
|                 | RC        | GCAACTGCCAAGTTCACCAG |
| <i>Rho</i>      | FW        | TGCTCAACTTGGCCGT     |
|                 | RC        | GCGGAAGTTGCTCATCG    |
| <i>ActB</i>     | FW        | AGCCATGTACGTAGCCA    |
|                 | RC        | GAAGCTGTAGCCACGCT    |

**Supplementary table 3: Primer pairs for the cone phototransduction cascade gene qPCR.** The optimised primer pairs used in the qPCR experiment to characterise the changes in cone gene expression over time in *Rho*<sup>-/-</sup>, *OPN1-GFP* mice, compared to the *OPN1-GFP* mice as a reference.

Supplementary figure 4

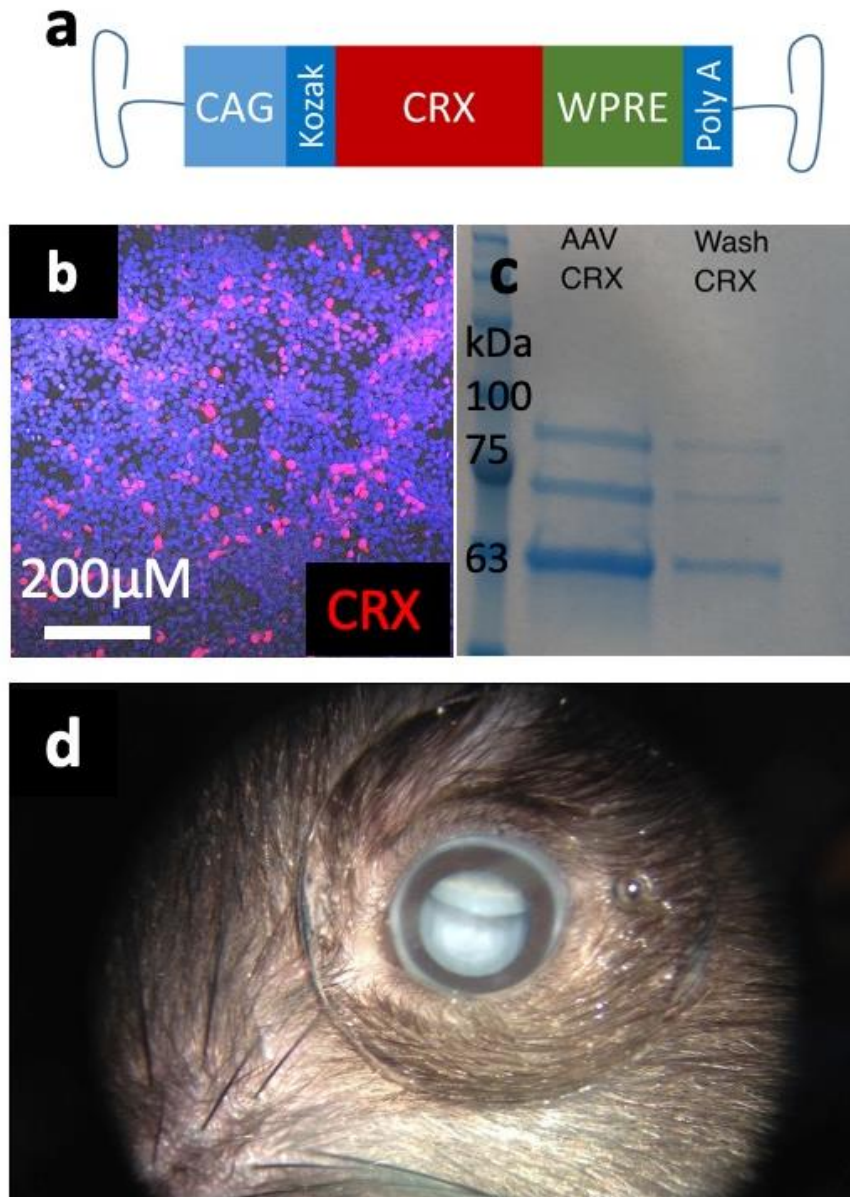

**Supplementary figure 4: Development and delivery of AAV** (a) Representation of the rAAV2/8.CAG.CRX.WPRE.pA vector structure. (b) The rAAV constructs was validated by transfecting HEK cells, culturing, and then staining fixed cells for CRX protein to confirm transgenic protein production under control of the mammalian promoter. (c) EZ Blue stained SDS gel showing electrophoretically separated protein bands of a protein reference ladder, concentrated AAV preparation and AAV wash. The three blue bands correspond to the three subunits of the AAV capsid (87, 73 and 62kDa). (d) An example of subretinal delivery of rAAV.CRX vector into *Rho*<sup>-/-</sup>, *OPN1-GFP* mice, with the intended retinal detachment visible superiorly between 10 O'clock and 2 O'clock.

Supplementary figure 5

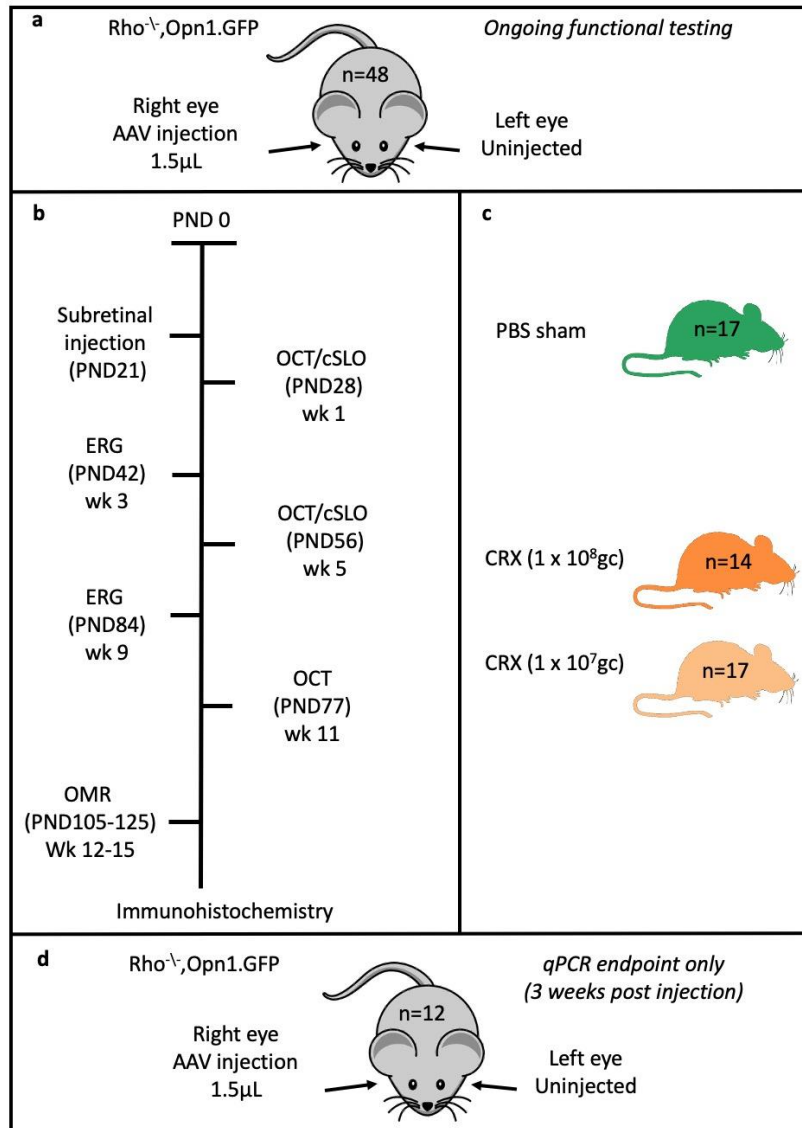

**Supplementary figure 5: Cohorts and study design.** (a) The study consisted of 48 *Rho*<sup>-/-</sup>, *OPN1-GFP* mice receiving subretinal injections of rAAV.CRX or PBS into one eye only; the fellow eye remained an uninjected control. (b) This cohort was followed over 14 weeks following injection (some were sacrificed 7 weeks post injection for IHC; *n*=6) with ERG, OCT, cSLO and OMR, before being sacrificed for IHC. (c) Mice were allocated to one of two treatment groups or sham. (d) An additional 12 *Rho*<sup>-/-</sup>, *OPN1-GFP* mice received subretinal injections of rAAV.CRX or sham for separate qPCR analysis 3 weeks post injection.
